# Supplementary material for: Body orientation affects brain ventricular system development and mechanosensory gene expression in zebrafish embryos
Source: Research Square preprint supplement (doi:10.21203/rs.3.rs-8767756/v1), 2026-02-19
Supplement: Supplementary file 1 [file 67f3de672b115f6c6aa2371c.docx]

**Supplementary materials:**

**Supplementary Table 1: The level of RF associated transcripts in different body positions.**

| N | **Genes** | **Expression level ratio,**  **vertical position/ wt, SD**  **48 hpf** | **p value** | **Expression level ratio,**  **reversed vertical position/ wt, SD**  **48 hpf** | **p value** |
| --- | --- | --- | --- | --- | --- |
| 1 | ***chl1a*** | 4.71±0.27 | 0.001 | 13.11±0.3 | 0.0001 |
| 2 | ***clusterin*** | 1.2±0.22 | n.s | 1.42±0.16 | 0.01 |
| 3 | ***lgals2a*** | 0.73±0.04 | 0.001 | 1.63±0.16 | n.s |
| 4 | ***lgals2b*** | 0.55±0.01 | 0.0001 | 0.52±0.21 | 0.05 |
| 5 | ***spon1a*** | 1.52±0.09 | n.s | 2.33±0.29 | n.s |
| 6 | ***sspo*** | 0.82±0.14 | n.s | 0.5±0.24 | 0.01 |

| N | **Genes** | **Expression level ratio,**  **vertical position/ wt, SD**  **48 hpf** | **p value** | **Expression level ratio,**  **reversed vertical position/ wt, SD**  **48 hpf** | **p value** |
| --- | --- | --- | --- | --- | --- |
| 1 | ***actn3b*** | 2.88±0.1 | 0.01 | 2.53±0.04 | 0.01 |
| 2 | ***ctnna2*** | 1.27±0.23 | n.s | 2.09±0.13 | 0.01 |
| 3 | ***itga3b*** | 0.95±0.10 | 0.05 | 1.55±0.15 | n.s |
| 4 | ***itgb2*** | 1.43±0.10 | 0.01 | 1.67±0.15 | 0.01 |
| 5 | ***itgb1b.1*** | 1.52±0.1 | 0.01 | 3.04±0.06 | 0.001 |
| 6 | ***lats1*** | 2.55±0.14 | 0.01 | 4.6±0.05 | 0.001 |
| 7 | ***mst1*** | 1.27±0.15 | 0.05 | 1.06±0.07 | n.s |
| 8 | ***nf2a*** | 1.21±0.07 | 0.05 | 1.46±0.06 | 0.01 |
| 9 | ***yap1*** | 4.95±0.08 | 0.001 | 4.68±0.07 | 0.001 |

**Supplementary Table 2: The levels of transcripts linked to mechano-elastic properties of cells in different body positions.**

**Supplementary Table 3: The list of primers**

| N | **Genes** | **qRT-PCR primers, 5' - > 3'** |
| --- | --- | --- |
| 1 | ***actn3b*** | ACACAGACCAGACCTCATC  CTCCATCAGCCGTTCATTC |
| 2 | ***ctnna2*** | GCCTCTCGCCTCGTCTAC  TAAGTTGGTCATCTTCTGTCTGG |
| 3 | ***chl1*** | TGCAGCATTCGTGCTCAACGT  AACAGCCGATGAGGACAAGCA |
| 4 | ***clusterin*** | TCGCAAGTTGGTGAGAAATAC  GGAGGCTGTGAAACAAGGAGT |
| 5 | ***itga3b*** | GGCAGTAACAGACCTCAACAATG  CTCCGACCGCAGCAATGG |
| 6 | ***itgb2*** | TGGCTGGAGTGGCATTG  AGTGGTTGTGGCATTCTGG |
| 7 | ***itgb1b.1*** | GCTGGTTATGCCTTACATTCTG  TCTGCTTGCTGACTTCTTGG |
| 8 | ***lgals2a*** | GGAGCACAGAGACAACAAC  ATCCTGACTTCGCCTTCG |
| 9 | ***lgals2b*** | CAACAACTCAGCAAGATGG  TGAAGTGAAGAGCGATGG |
| 10 | ***lats1*** | TCGGAGGAAGAGAAGAAGC  TGAGGCGGATGTAGTTGG |
| 11 | ***mst1*** | GAGGTCCAGGTTAAGAATC  CCATCATAGCAGTGTATCC |
| 12 | ***nf2a*** | TGGAGGCTGAGATGATTG  TGCTGAAGTTGAAGTTAGG |
| 13 | ***spon1a*** | GTGACCAAGAGGAGGATTATGCT  TGTCATGAATTGCGTGTCTTCCT |
| 14 | ***sspo*** | CAGTGTGGATTGTGATGTG  CAGAGCAGAAGCGATACC |
| 15 | ***yap1*** | CTACTACATCAATCACAAGAAC  CCACTCATCACTCCACTC |
